# Supplementary material
Source: publisher figshare collection journal article supplement (https://acs.figshare.com/ndownloader/files/3860806)
Supplement: Supplementary file 1 [file 3860806]

# **Supporting Information**

## **State-of-art of recycling e-wastes by vacuum metallurgy separation**

**Lu Zhan<sup>a\*</sup>, Zhenming Xu<sup>b</sup>**

a Shanghai Key Lab for Urban Ecological Processes and Eco-Restoration, School of Ecological and Environmental Science, East China Normal University, 500 Dong chuan Road, Shanghai, P.R. China

b School of Environmental Science and Engineering, Shanghai Jiao Tong University  
800 Dong chuan Road, Shanghai, P.R. China

### **Supporting Information Content**

9 pages (including the cover page)

6 Figures

3 Tables

---

Corresponding author phone: +86 21 54341064; fax:+86 21 54747495; e-mail:  
[lzhan@des.ecnu.edu.cn](mailto:lzhan@des.ecnu.edu.cn)

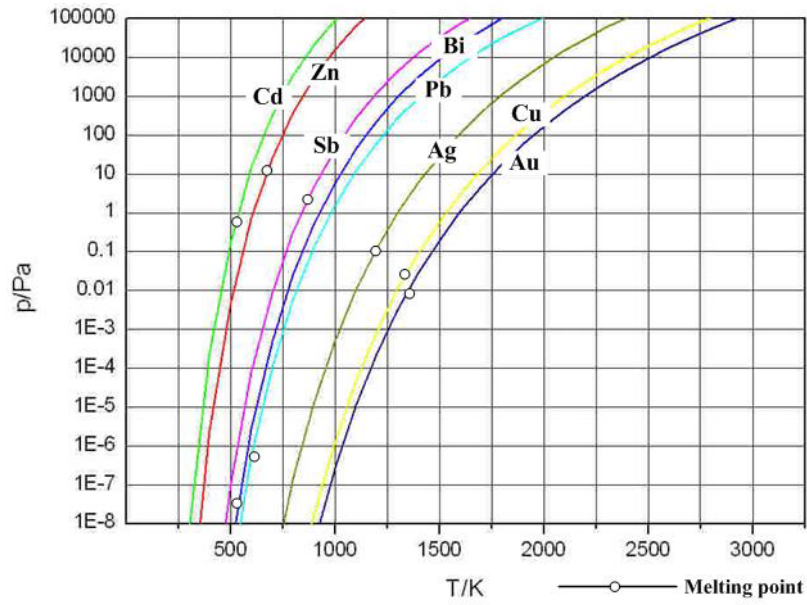

FIGURE S1 The relationship between the saturation pressure and temperature of metals (37).

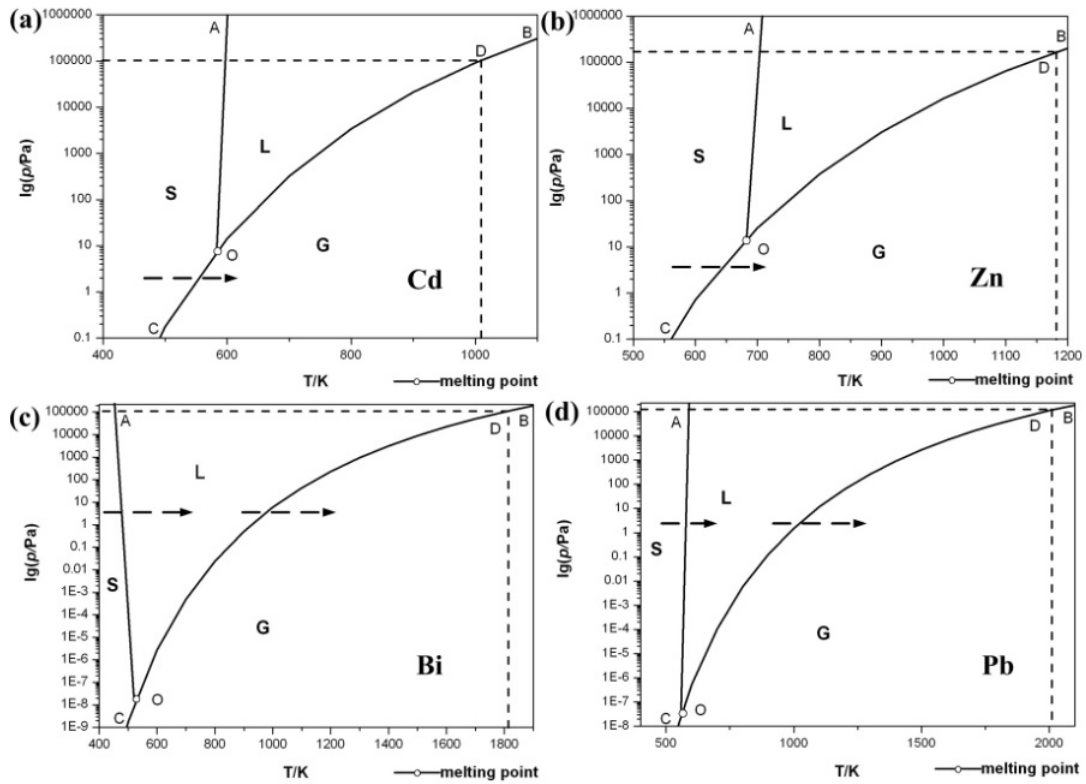

Figure S2. The triple phase equilibrium graphs of metals (38).

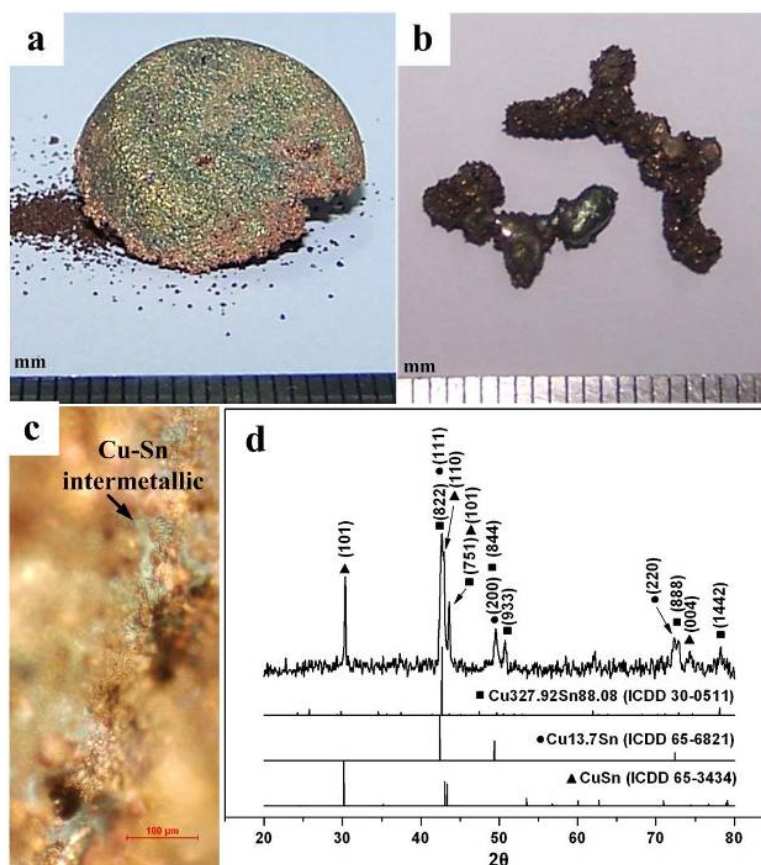

FIGURE S3. Cu-Sn intermetallic formed on the bottom of crucible (a), among Cu particles (b), its micrograph (c) and the corresponding XRD pattern (d) (41).

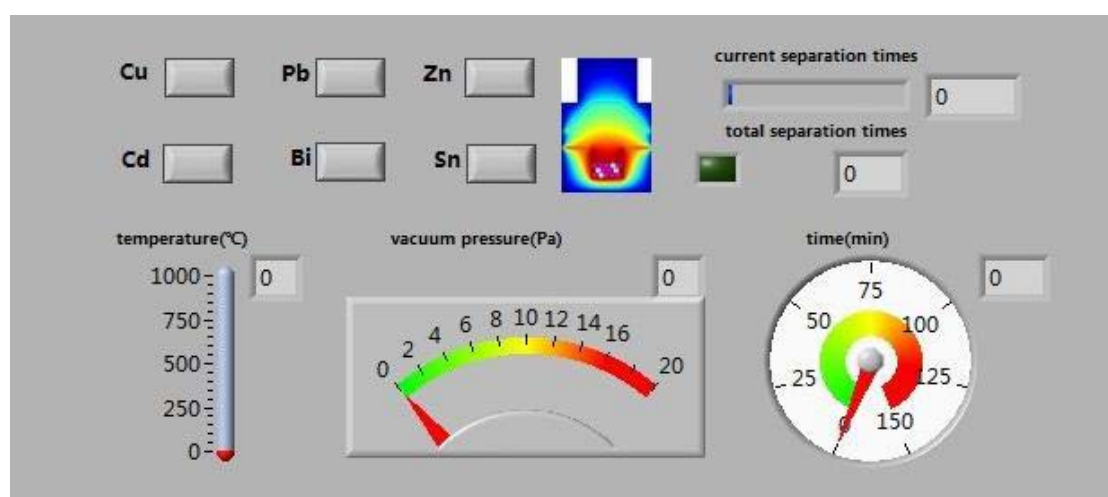

Figure S4 The designed front panel based on Labview (42)

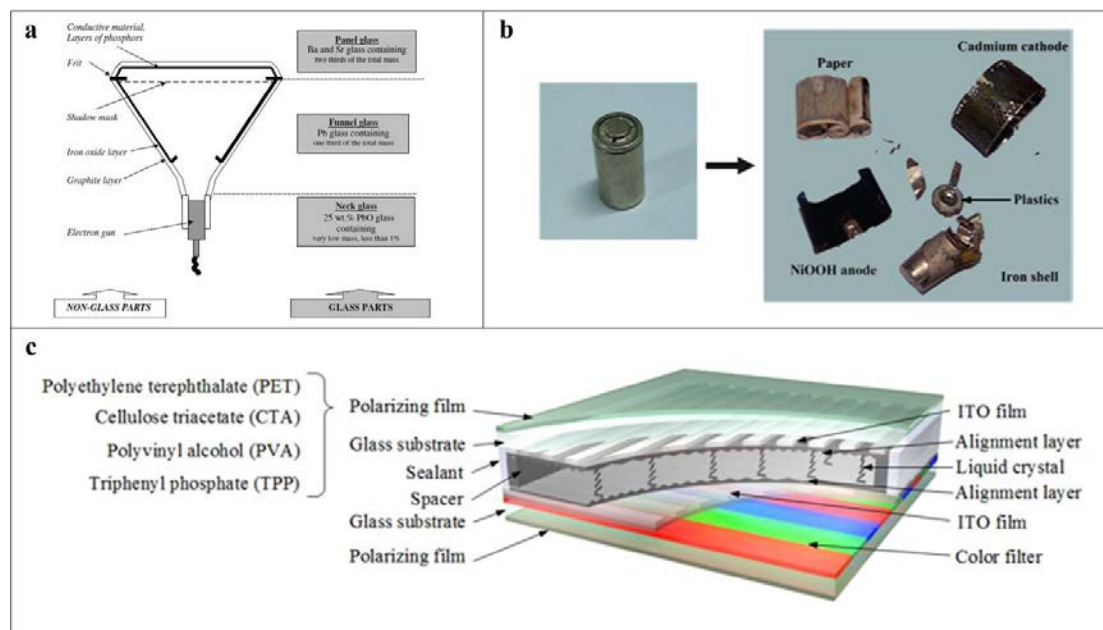

Figure S5 Schematic diagrams of several kinds of e-wastes

a Schematic diagram of the CRT components (46), b Schematic diagram of a dismantled waste Ni-Cd battery (53), c Schematic diagram of the LCD panel (78).

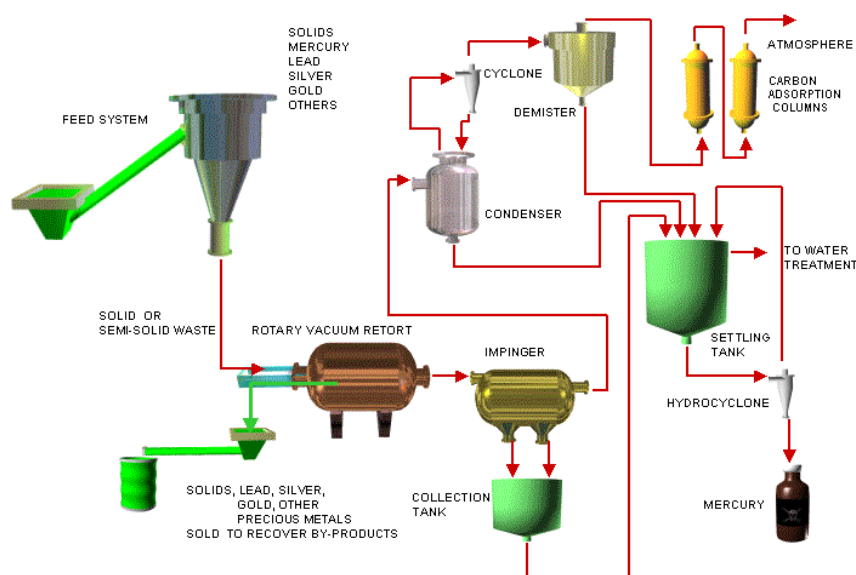

Figure S6. Flow diagram of the SepraDyne separation process (70)

Table S1 The comparison of different methods for e-wastes recycling

|                               | methods                                                                                          | materials recycled                         | advantages                                                              | disadvantages                                                                                            |
|-------------------------------|--------------------------------------------------------------------------------------------------|--------------------------------------------|-------------------------------------------------------------------------|----------------------------------------------------------------------------------------------------------|
| Hydrometallurgical recycling  | adsorption, leaching, cementation, solvent extraction, ion exchange, etc.                        | mainly Cu, Au, Ag, Pd                      | low costs, operational flexibility, high selectivity, high metal purity | high solvent consumption, leaching solution needs to be further treated                                  |
| Pyrometallurgical recycling   | incineration, smelting, drossing, sintering, melting, etc.                                       | mainly precious metals                     | no requirements for the compositions of wastes                          | high costs, gas/dust needs to be further treated, possible formation of dioxins                          |
| Biological recycling          | bioleaching, biosorption, etc.                                                                   | mainly Cu, Au                              | low costs, easier operability, better environmental property            | low recovery efficiency, time consuming, difficult to select the biomass with high adsorption capacities |
| Mechanical physical recycling | screening, magnetic separation, eddy current separation, electrostatic separation, jigging, etc. | Fe, Al, glasses, plastics                  | better environmental property, easier operability, low costs            | loss of valuable metals due to the insufficient liberation, generate noises and dusts                    |
| VMS                           | vacuum evaporation, vacuum carbon reduction, vacuum pyrolysis, etc.                              | mainly Cd, Pb, Hg, Zn, also toxic organics | no waste gas nor liquid, high metal purity, high recovery efficiency    | high costs, require sufficient pretreatments                                                             |

Table S2 Applications of VMS on e-wastes recycling.

| Vacuum technology       | Combined measures                                     | Participant reactant | Treated object                      | Operating parameters                                                                                      | Recovered materials                               | Residues              | Appeared section | Literature |
|-------------------------|-------------------------------------------------------|----------------------|-------------------------------------|-----------------------------------------------------------------------------------------------------------|---------------------------------------------------|-----------------------|------------------|------------|
| Vacuum evaporation      | Dismantling, crushing, and electrostatic separating   | -                    | WPCBs                               | 1123 K under 0.1-1 Pa for 90 min                                                                          | Pb, Cd                                            | Cu-Sn alloy           | 3.1              | 37, 39, 41 |
| Vacuum carbon reduction | Crushing                                              | Carbon               | CRT                                 | 1273 K under 1000 Pa for 4 h, 9% of carbon adding amount                                                  | Pb, K, Na                                         | foam glass            | 3.2              | 47,48      |
| Vacuum carbon reduction | Inert-gas injecting                                   | Carbon               | CRT                                 | 1273 K under 500–2000 Pa for 2–4 h, 10% of carbon adding amount, 50–200 ml/min of the argon gas flow rate | nano-lead particles with 4–34nm                   | harmless glass powder | 3.2              | 49         |
| Vacuum evaporation      | -                                                     | -                    | Grids of waste lead-acid battery    | 900 K under 5-7 Pa for 30 min                                                                             | Sb, Sb <sub>2</sub> O <sub>3</sub> and Pb bullion | -                     | 3.3              | 51         |
| Vacuum reduction        | Treated with Na <sub>2</sub> CO <sub>3</sub> solution | Carbon               | Pastes of waste lead-acid battery   | 1000 K under 2-4 kPa for 90 min                                                                           | Pb                                                | -                     | 3.3              | 51         |
| Vacuum pyrolysis        | -                                                     | -                    | Plastics of waste lead-acid battery | 923 K under 50-80 Pa for 30 min                                                                           | Pyrolysis oil, gas                                | -                     | 3.3              | 51         |
| Vacuum distillation     | -                                                     | -                    | Ni-Cd batteries                     | 1173 K under 100 Pa for 2h                                                                                | Cd                                                | Ni–20% Co alloy       | 3.4              | 56, 57     |
| Vacuum distillation     | -                                                     | Carbon               | Ni-Cd batteries                     | 1027 K under 1.33 Pa for 1.5 h, 1 % of                                                                    | Cd                                                | NiFe scrap            | 3.4              | 63         |

|                                     |                               |                    |                                  |                                                                               |                                |                                           |     |        |
|-------------------------------------|-------------------------------|--------------------|----------------------------------|-------------------------------------------------------------------------------|--------------------------------|-------------------------------------------|-----|--------|
|                                     |                               |                    |                                  | carbon adding amount                                                          |                                |                                           |     |        |
| Vacuum evaporation                  | -                             | -                  | Zn-Mn batteries                  | 573 K under 35-600 Pa for 4h                                                  | Hg                             | Slags of Fe, MnO <sub>2</sub> , and ZnO   | 3.5 | 65     |
| Vacuum evaporation                  | -                             | -                  | Mercury button cells             | 623 K-923 K under 100 Pa                                                      | Hg                             | not mention                               | 3.5 | 67, 68 |
| Vacuum evaporation                  | Magnetic separation           | CaO                | Zn-Mn dry batteries              | 1073-1123 K under 250 Pa for 60 min, 20% of CaO adding amount                 | Zn                             | manganese oxide                           | 3.6 | 74     |
| Vacuum evaporation                  | -                             | -                  | Alkaline manganese dry batteries | 1200 K under 10Pa                                                             | Zn                             | Slags of MnO <sub>2</sub> , ZnO and steel | 3.6 | 76     |
| Vacuum chlorinated separation       | Grinding to less than 0.13 mm | NH <sub>4</sub> Cl | LCDs                             | 673 K under 0.09 MPa for 10 min, with 33% of NH <sub>4</sub> Cl adding amount | Indium chloride                | Glass powder                              | 3.7 | 81     |
| Vacuum carbon reduction             | Grinding to less than 0.3 mm  | Carbon             | LCDs                             | 1223 K under 1 Pa with 30 wt% carbon addition for 30 min                      | In                             | Glass powder                              | 3.7 | 82     |
| Vacuum CO reduction and evaporation | -                             | CO                 | ITO scraps                       | 1023 K, with 70 vol% CO for 90 min                                            | In-Sn alloy                    | -                                         | 3.7 | 83     |
|                                     | -                             | -                  | In-Sn alloy                      | 1373 K under 1 Pa for 30 min                                                  | In                             | Sn                                        | 3.7 | 83     |
| Vacuum pyrolysis                    | Centrifugal separation        | -                  | WPCBs                            | 873 K under 1.5 kPa for 30 min                                                | pyrolysis oils, gases, solders | metals, glass fibers, etc.                | 4.1 | 85, 86 |
| Vacuum pyrolysis                    | Crushing, screening           | -                  | WPCBs                            | 825 K under 20 kPa for 120 min                                                | pyrolysis oils, gases          | Cu foil, glass fibers, carbon             | 4.1 | 88     |

|                     |           |                     |                                         |                                         |                                                         |                                                   |     |        |
|---------------------|-----------|---------------------|-----------------------------------------|-----------------------------------------|---------------------------------------------------------|---------------------------------------------------|-----|--------|
|                     |           |                     |                                         |                                         |                                                         |                                                   |     |        |
| Vacuum co-pyrolysis | -         | Chinese fir sawdust | WPCBs                                   | 773 K under 10 kPa for 30 min           | co-pyrolysis oils with more brominated compounds, gases | not mention                                       | 4.1 | 89     |
| Vacuum evaporation  | Dismantle | -                   | Pole transformers                       | 473 K under <7Pa for 10 h               | oil                                                     | component materials with PCB less than 0.05 mg/kg | 4.2 | 92, 93 |
| Vacuum evaporation  | Dismantle | -                   | Capacitors and pressure-sensitive paper | 668 –673 K under 6.0 to 6.5 kPa for 4 h | oil                                                     | component materials with PCB less than 0.1 mg/kg  | 4.2 | 96     |
| Vacuum pyrolysis    | -         | -                   | LCDs                                    | 573 K under 50 Pa for 30 min            | pyrolysis oils, gases                                   | residues containing In                            | 4.3 | 78     |
| Vacuum pyrolysis    | -         | -                   | Metal-free electric cable waste         | 723 K under 20 kPa for 30 min           | pyrolysis oils, gases                                   | wax and carbon black                              | 4.3 | 101    |



Table S3. Summary of cost basis information for the SepraDyne process (70)

| Parameter                     | Design and Cost Basis                                                                |
|-------------------------------|--------------------------------------------------------------------------------------|
| Plant Life                    | 10 years                                                                             |
| Operations                    | 250 days/year, 5 days/week, 8 hrs/day                                                |
| Throughput                    | 1000 lbs/hr                                                                          |
| Treatment Process             | High vacuum rotary retort                                                            |
| Capital Costs                 | Processing equipment, air pollution control equipment, scale and forklift            |
| Operating Cost                | Laborers, oversight and management support and electricity                           |
| Disposal Costs                | \$1000/M <sup>3</sup> for solids, \$ 0.10/gal for wastewater, \$ 25/gal for organics |
| Decommissioning Costs         | Not included                                                                         |
| Personal protection equipment | Purchase and disposal costs                                                          |
| Transportation                | Shipping costs to disposal site                                                      |

All the references cited in SI have been listed in the text, and they have the same numbers.
